# Supplementary material for: Arsenic Removal via the Biomineralization of Iron-Oxidizing Bacteria Pseudarthrobacter sp. Fe7
Source: MDPI journal article supplement (doi:10.3390/microorganisms11122860), 2023-11-26
Supplement: s1 [file s1]

# Arsenic Removal via the Biomineralization of Iron-Oxidizing Bacteria *Pseudarthrobacter* sp. Fe7

Xia Fan <sup>1</sup>, Hanxiao Zhang <sup>1</sup>, Qian Peng<sup>1</sup>, Yongliang Zheng <sup>1</sup>, Kaixiang Shi <sup>2\*</sup> and Xian Xia <sup>3\*</sup>

<sup>1</sup> College of Biology and Agriculture Resources, Huanggang Normal University, Huanggang 438000, China; fanxia@hgnu.edu.cn (X.F.); 15038881601@163.com (H.Z.); m18040651471@163.com (Q.P.); zylgolden@126.com (Y.Z.)

<sup>2</sup> National Key Laboratory of Agricultural Microbiology, College of Life Science and Technology, Huazhong Agricultural University, Wuhan 430070, China

<sup>3</sup> Hubei Key Laboratory of Edible Wild Plants Conservation & Utilization, Hubei Engineering Research Center of Characteristic Wild Vegetable Breeding and Comprehensive Utilization Technology, College of Life Science, Hubei Normal University, Huangshi 43500, China

\* Correspondence: kaixiangshi@mail.hzau.edu.cn (K.S.); xianxia@hbnu.edu.cn (X.X.)

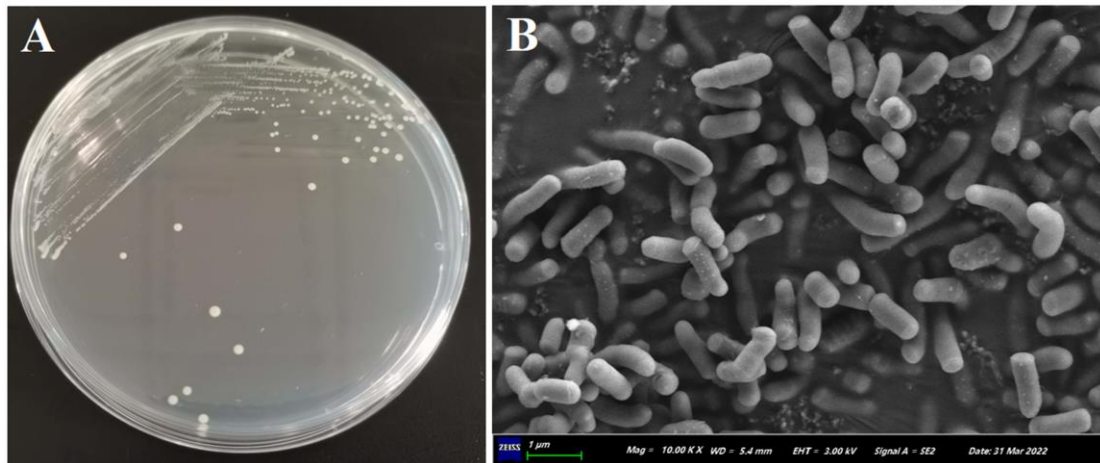

**Figure S1.** (A) Colony morphology and (B) SEM image of strain Fe7.

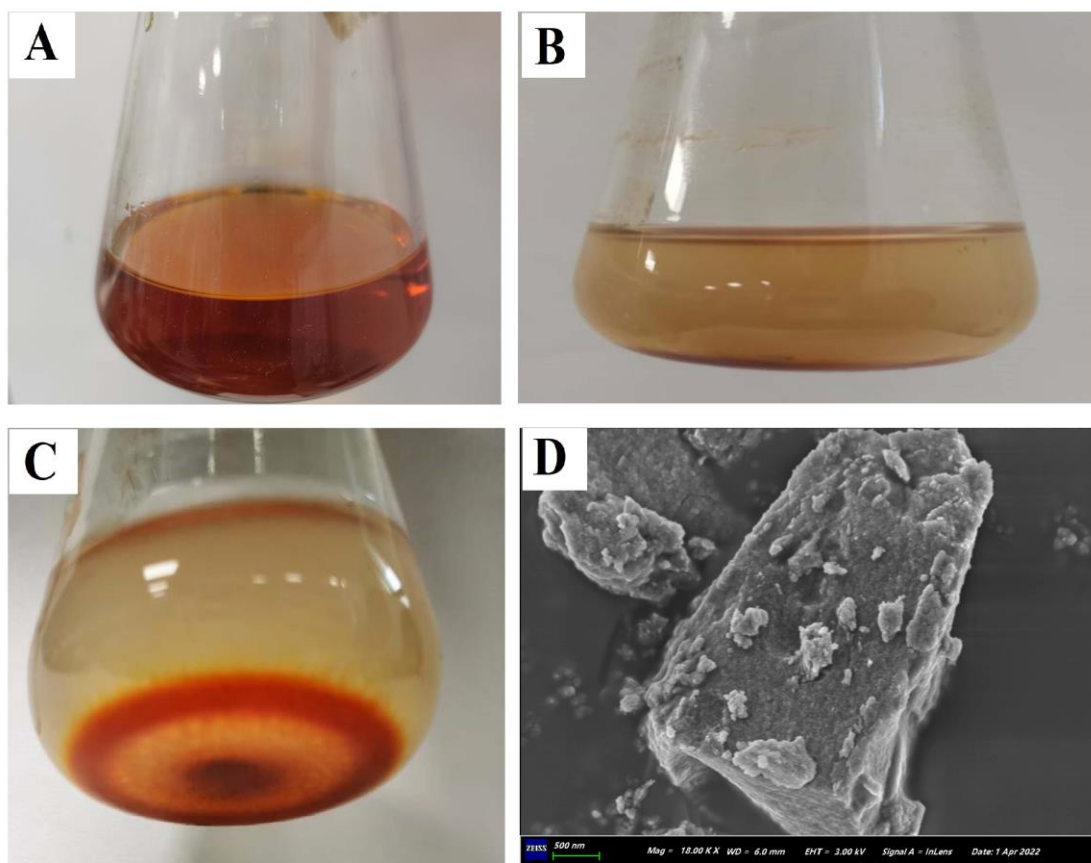

**Figure S2.** Growth status of strain Fe7 in a modified PYCM liquid medium and SEM image of the iron precipitate produced by strain Fe7. (A) Medium without strain Fe7. (B) Cell suspension. (C) Biological iron precipitates. (D) SEM pattern.
